# Supplementary material for: Effect of Indoor Environment on Occupant Air Comfort and Productivity in Office Buildings: A Response Surface Analysis Approach
Source: MDPI journal article supplement (doi:10.3390/su142315719), 2022-11-25
Supplement: s1 [file s1]

| Source                                                 | DF  | Adj SS  | Adj MS  | P-Value | F-Value |
|--------------------------------------------------------|-----|---------|---------|---------|---------|
| Model                                                  | 41  | 295.755 | 7.2135  | 0.000   | 30.64   |
| Linear                                                 | 15  | 81.870  | 5.4580  | 0.000   | 23.19   |
| CO2                                                    | 1   | 55.197  | 55.1971 | 0.000   | 234.48  |
| VOC                                                    | 1   | 0.024   | 0.0238  | 0.001   | 0.10    |
| Relative Humidity                                      | 1   | 0.369   | 0.3688  | 0.012   | 1.57    |
| Temperature                                            | 1   | 0.106   | 0.1062  | 0.502   | 0.45    |
| Outside temperature                                    | 1   | 2.347   | 2.3474  | 0.002   | 9.97    |
| Outside Relative Humidity                              | 1   | 0.300   | 0.3004  | 0.059   | 1.28    |
| Sound                                                  | 1   | 0.012   | 0.0122  | 0.820   | 0.05    |
| Light                                                  | 1   | 0.426   | 0.4261  | 0.179   | 1.81    |
| Kind of Workspace                                      | 4   | 0.997   | 0.2492  | 0.377   | 1.06    |
| Do you sit near (wall type):                           | 3   | 2.990   | 0.9966  | 0.006   | 4.23    |
| Square                                                 | 2   | 6.063   | 3.0315  | 0.000   | 12.88   |
| CO2*CO2                                                | 1   | 3.660   | 3.6597  | 0.000   | 15.55   |
| Sound*Sound                                            | 1   | 2.969   | 2.9688  | 0.000   | 12.61   |
| 2-Way Interaction                                      | 24  | 17.260  | 0.7192  | 0.000   | 3.06    |
| CO2*VOC                                                | 1   | 1.022   | 1.0221  | 0.038   | 4.34    |
| CO2*Light                                              | 1   | 1.564   | 1.5643  | 0.010   | 6.65    |
| VOC*Light                                              | 1   | 1.516   | 1.5163  | 0.012   | 6.44    |
| VOC*Kind of Workspace                                  | 4   | 2.617   | 0.6541  | 0.027   | 2.78    |
| Relative Humidity*Light                                | 1   | 1.018   | 1.0183  | 0.038   | 4.33    |
| Temperature*Sound                                      | 1   | 2.502   | 2.5022  | 0.001   | 10.63   |
| Outside temperature*Sound                              | 1   | 1.121   | 1.1208  | 0.030   | 4.76    |
| Outside temperature*Do you sit near (wall type):       | 3   | 4.470   | 1.4899  | 0.000   | 6.33    |
| Outside Relative Humidity*Sound                        | 1   | 0.930   | 0.9305  | 0.048   | 3.95    |
| Outside Relative Humidity*Do you sit near (wall type): | 3   | 1.718   | 0.5728  | 0.065   | 2.43    |
| Light*Kind of Workspace                                | 4   | 3.388   | 0.8469  | 0.007   | 3.60    |
| Light*Do you sit near (wall type):                     | 3   | 6.437   | 2.1458  | 0.000   | 9.12    |
| Error                                                  | 323 | 76.037  | 0.2354  |         |         |
| Lack-of-Fit                                            | 319 | 75.537  | 0.2368  | 0.285   | 1.89    |
| Pure Error                                             | 4   | 0.500   | 0.1250  |         |         |
| Total                                                  | 364 | 371.792 |         |         |         |

| S               | R-sq   | R-sq(adj) | R-sq(pred) |
|-----------------|--------|-----------|------------|
| <b>0.485188</b> | 79.55% | 76.95%    | 73.93%     |
